# Supplementary material for: {[Cu2(bpdado)2(H2O)2]·H2O}n: A 1D nanotubular coordination polymer with wall made of edge-sharing hexagons, where bpdado = 2,2′-bipyridine-3,3′-dicarboxylate-1,1′-dioxide
Source: Royal Society of Chemistry journal article supplement (doi:10.1039/b509883a), 2005-01-01
Supplement: b509883a.pdf [file b509883a.pdf]

**Supporting information** for paper entitled “ $\{[\text{Cu}_2(\text{bpdado})_2(\text{H}_2\text{O})_2]\cdot\text{H}_2\text{O}\}_n$ : A 1D nanotubular coordination polymer with wall of edge-sharing hexagons, where  $\text{bpdado}=\text{2,2'-bipyridine-3,3'-dicarboxylate 1,1'-dioxide}$ ”, by F. Chang *et al.*

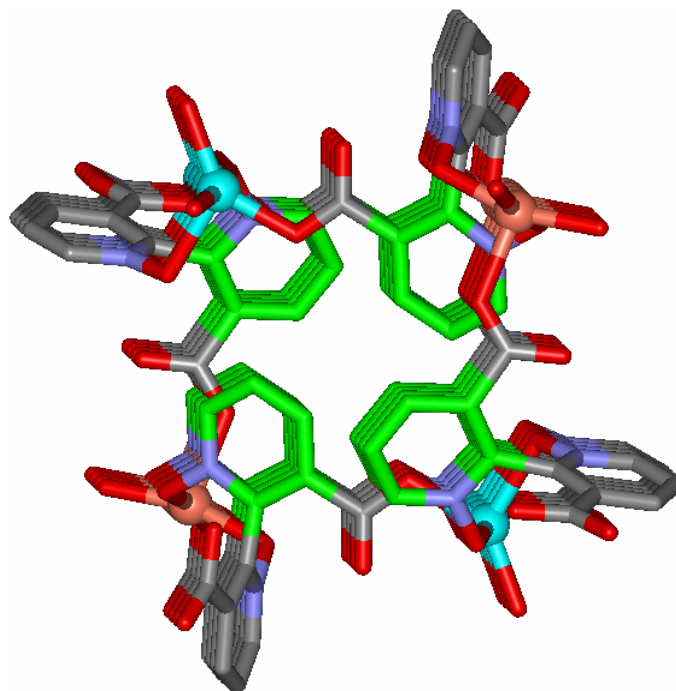

**Fig. S1.** Top view of the 1D nanotubular polymer with the same color scheme as Fig. 1a

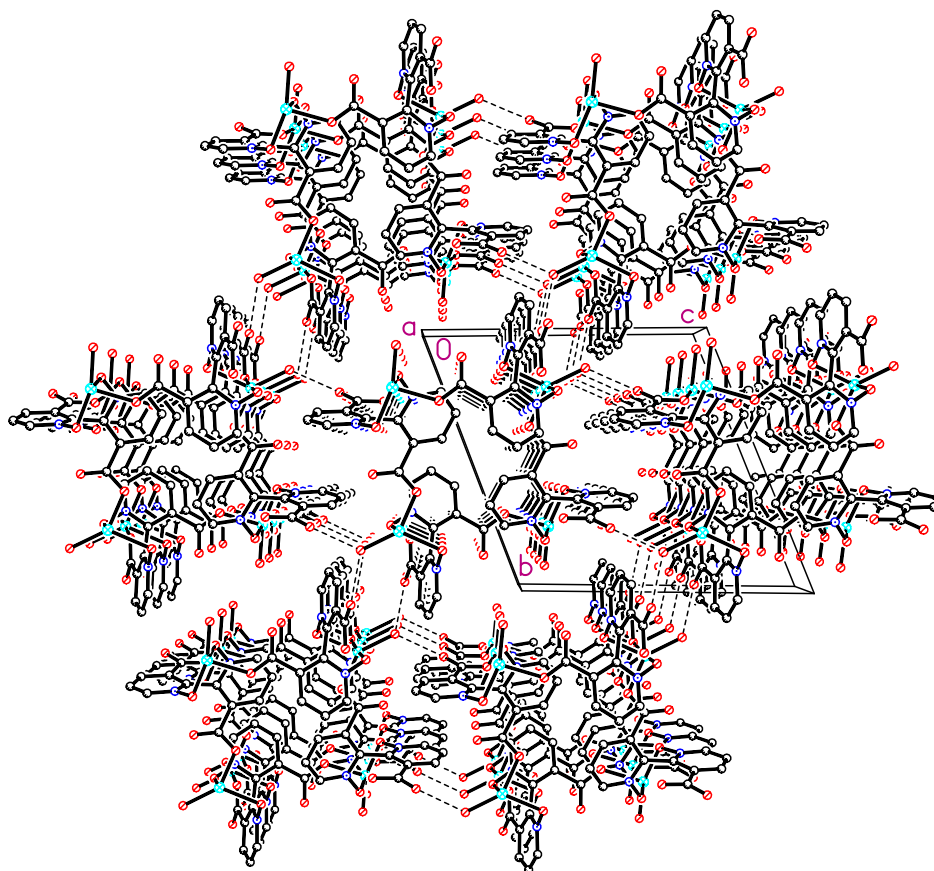

**Fig. S2.** The packing of the discrete 1D nanotubular polymeric units in the crystal of **1**. Dashed lines are inter-unit O–H...O hydrogen bonds. The disordered interstices water molecules are omitted.

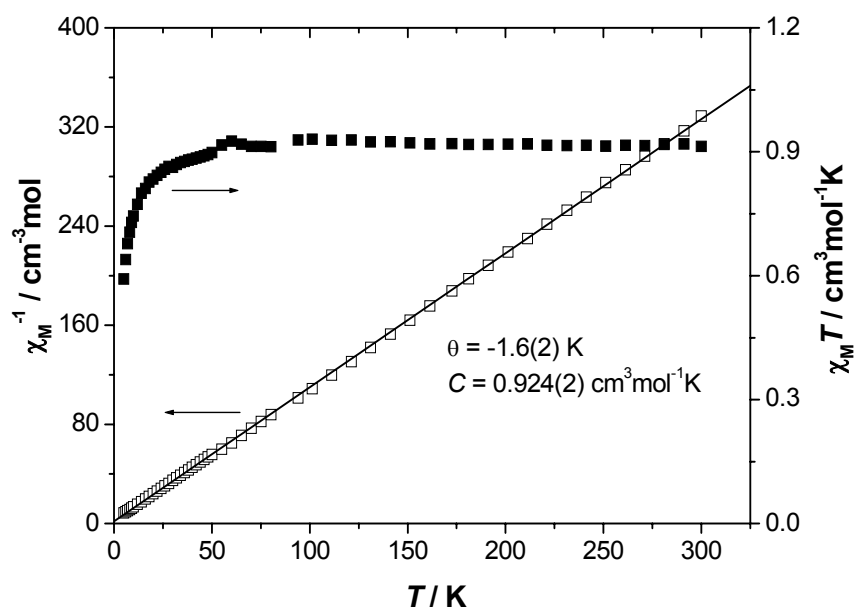

**Fig. S3.** Plot of temperature dependence of  $\chi_M^{-1}$  and  $\chi_M T$  for **1**, under 10 kOe field.
